# 1 Identification of new angio-architectural features of at-risk cranial 2 dural arteriovenous fistulas using machine learning approaches.

3  
4 Katharina Frank<sup>1,3</sup>, Paiman Shalchian-Tehran<sup>1,3</sup>, Mihai Manu<sup>1,3\*</sup>, Zafer Cinibulak<sup>1</sup>, Jörg  
5 Poggenborg<sup>2</sup>, Makoto Nakamura<sup>1</sup>

6  
7 <sup>1</sup>Department of Neurosurgery, Cologne-Merheim Medical Center, Witten/Herdecke  
8 University

9 <sup>2</sup>Department of diagnostic and interventional Radiology and Neuroradiology, Cologne-  
10 Merheim Medical Center, Witten/Herdecke University

11 <sup>3</sup> These authors contributed equally

12 \* Corresponding author [mihai.manu@uni-wh.de](mailto:mihai.manu@uni-wh.de)

13  
14

15 **Background.** Cranial dural arteriovenous fistulas (dAVF's) are rare complex vascular  
16 malformations that have a bleeding risk with potential lethal consequences. Despite this,  
17 the vascular architectural features associated with the rupture risk are not always clearly  
18 defined.

19 **Methods.** We retrospectively analyzed cranial arteriovenous fistulas in terms of their  
20 anatomical and angio-architectural features as evaluated on conventional subtraction  
21 angiography: Location of the fistula, fistula architecture, venous ectasia, reflux in cortical  
22 draining veins, presence of pial feeders, outflow stenosis, presence of a major sinus  
23 thrombosis, flow-associated arterial aneurysms as well as presenting symptoms.  
24 Patterns in the data were identified after multiple components analysis followed by  
25 automatic k-means clustering and their predictive power was confirmed using a neural  
26 network and a random forest classifier.

27 **Results.** New relevant features predictive of hemorrhage (venous outflow stenosis and  
28 fistula architecture) were identified using distinct but surprisingly converging modeling  
29 paradigms. Both the neural network and the random forest classifier achieved a  
30 relatively high performance metric, with area under the receiver operating characteristic  
31 curve (ROC AUC) of 0.875 [95% CI, 0.75-1.0]. The relevance of these findings was  
32 verified by performing a multiple correspondence analysis followed by k-means  
33 clustering in the angiographic feature vector space. There was good agreement  
34 between the ground truth (hemorrhage) and the cluster labels (adjusted Rand score  
35 0.273, purity index 0.82).

36 **Conclusion.** Machine learning approaches confirmed the importance of previously  
37 described features (reflux in a cortical vein and venous ectasia) but also uncovered  
38 novel relevant characters (outflow stenosis and fistula architecture) for the hemorrhage  
39 risk of dAVF's.

40

## 41 **Introduction**

42

43 Cranial dural arteriovenous fistulas (dAVF's) are abnormal direct arteriovenous shunts  
44 within the dura with multifactorial pathogenesis, which are acquired and can develop  
45 spontaneously, after traumatic head injury or e.g. after thrombosis of the venous sinus.  
46 dAVFs are making up around 10% of all intracranial vascular malformations and have  
47 an incidence around 0,15-0,29 per 100,000 adults per year(1, 2). Patients harboring  
48 these malformations are typically middle-aged, but the lesions can, although less  
49 frequently, occur in children. The symptoms are presumed to depend on the presence  
50 or absence of venous hypertension and can vary from benign symptoms (e.g. tinnitus)  
51 up to severe hemorrhage in any of the three compartments (intracerebral, subdural  
52 and/or subarachnoidal) or non-hemorrhagic neurologic deficits (NHNDs) such as  
53 seizures(2). Regardless of presentation, the first line imaging tools are computed  
54 tomography and CT-angiography, less frequently magnetic resonance  
55 imaging/angiography/venography (MRI, MRA, MRV), whereas digital subtraction  
56 angiography (DSA) represents the gold standard for diagnosis and therapy(3).

57 There are several classification and grading systems, aiming to stratify the risk and  
58 guide treatment decisions, of which the Cognard and the Borden classifications are  
59 commonly used(4, 5). Higher-grade fistulas, associated with venous hypertension and  
60 consequently ectatic cortical veins, are presumed to carry an increased hemorrhage  
61 risk, have poorer outcomes and thus are prone to a more aggressive treatment  
62 approach(6-8).

63 We hypothesized that venous hypertension is the result of nonlinear interactions of  
64 features that have a direct angiographic correspondence (not necessarily in the form of  
65 dilated cortical veins, as evidenced by symptomatic fistulas that do not exhibit this  
66 character), that the hemorrhage risk of dAVF's may largely depend on these features,  
67 and that these dependencies, given their nonlinear nature, are not likely captured by  
68 traditional statistical methods. Our goal was to explore the use of machine learning in  
69 identifying potential relevant, hidden, angio-architectural features of dural arteriovenous  
70 fistulas helping neurosurgeons and interventional neuroradiologists in clinical decision-  
71 making process.

72

## 73 **Methods**

74

75 Our retrospective cohort comprised 23 cranial dural arteriovenous fistulas that  
76 underwent digital subtraction angiography at the Department of Neurosurgery of the  
77 Cologne-Merheim Medical Center between January 2017 and December 2022.  
78 Additionally, all patients that presented with hemorrhage or non-hemorrhagic

79 neurological deficits received at least a CT scan or CT-angiography. The recorded  
80 imaging parameters were location of the fistula, fistula architecture, venous ectasia,  
81 cortical venous drainage, presence of pial feeders, outflow stenosis, presence of a  
82 major sinus thrombosis and flow-associated arterial aneurysms. The clinical variables  
83 included age, sex and symptoms at presentation.

84 The machine learning was implemented by means of custom-written routines in Python.  
85 We applied a dimensionality reduction algorithm (multiple correspondence analysis  
86 (MCA), prince python package (9)) to identify the direction of largest variance by  
87 performing a singular value decomposition of the chi-square distance matrix followed by  
88 automatic k-means clustering in the resulting low-dimensional space.

89 Both the random forest classifier as well as the neural network (based on the multi-layer  
90 perceptron (MLP) classifier, supplemental figure 1 A) were implemented by means of  
91 the scikit-learn Python package(10). The shallow feedforward neural network had one  
92 output and one input layer as well one hidden layer comprising 12 neurons with rectified  
93 linear activation functions (ReLU) and standard backpropagation with gradient descent  
94 (Adam) with the goal to minimize the objective function (binary cross-entropy loss).

95

## 96 **Results**

97

98 The median age at the time of diagnosis was 59 years (range: 28-84). There were 70%  
99 males (16/23) and 30% female (7/23) patients. The angiographic features, anatomical  
100 location, Cognard class of the fistula as well as the presenting symptoms are  
101 summarized in Table 1 and illustrated in Figure 1.

102 In order to extract hidden and relevant features for the hemorrhage risk from the  
103 conventional subtraction angiography, we trained (80% of the data) and tested (20% of  
104 the data) a shallow feed-forward neural network (ANN), where the input was a list of  
105 fistula characters and the output was the probability of being in one of two categories  
106 (hemorrhage vs non-hemorrhage). The model achieved a relatively high receiver  
107 operating characteristic area under the curve (ROC AUC) score of 0.875 [95% CI, 0.75-  
108 1.0] and an accuracy of 0.8, indicating good performance in predicting the outcome of  
109 interest. Independently checking the model performance with 5-fold cross-validation  
110 resulted in a cross-validation accuracy of  $0.82 \pm 0.094$  (supplemental figure 1 B and C).  
111 We next looked at the importance scores of the different input features, as represented  
112 by the sum of the weight values for individual input features across all the layers. We  
113 found the largest score for reflux in a cortical draining vein, venous outflow stenosis and  
114 presence of pial feeders.

115 Next, we asked if the same results can be reproduced by applying a different  
116 supervised learning algorithm. To this end, we turned to a random forest classifier,  
117 applied to the same dataset. Again, the model achieved a relatively high receiver

118 operating characteristic area under the curve (ROC AUC) score of 0.875 [95% CI, 0.75-  
119 1.0] indicating also good performance in predicting the outcome. Interestingly and  
120 importantly, the most significant three features in making accurate prediction within the  
121 model were venous outflow stenosis, venous ectasia and presence of pial feeders.

122 Thus, the analysis of feature importance of two distinct models revealed a consistent  
123 pattern: presence of venous outflow stenosis and pial feeders, next to venous ectasia  
124 and reflux in a cortical draining vein emerged as pivotal contributors to the classification  
125 task.

126 To verify these findings, we performed a dimensionality reduction by means of multiple  
127 correspondence analysis followed by k-means clustering in the dAVF's feature vector  
128 space. We found that the characters of the fistula that correlate best with the first two  
129 components (the eigenvectors with the largest eigenvalue, thus explaining most of the  
130 variance in the data) were the architecture of the fistula, venous outflow stenosis,  
131 venous ectasia and reflux in a cortical draining vein (supplemental figure 2 A). The  
132 automatic k-means clustering in this low-dimensional space was verified by checking  
133 the agreement between the ground truth (actual outcome) and the cluster labels  
134 (adjusted Rand score of 0.273 (range -1 to 1, values closer to 1 indicate better fit), purity  
135 index=0.82) (supplemental figure 2 B).

136

## 137 **Discussion**

138

139 Here we describe a novel approach to identify bleeding risk factors for cranial dural  
140 arteriovenous fistulas, by revealing patterns and their features in the data that best  
141 discriminate hemorrhagic/non-hemorrhagic lesions using MCA coupled with automatic  
142 k-means clustering and confirming the relevance of these hidden, important  
143 angiographic features that best predict hemorrhage using a shallow artificial neural  
144 network and a random forest classifier. This approach achieved 80% accuracy in  
145 correctly classifying those dAVF's that present with hemorrhage, and showed the  
146 importance of new, previously ignored features such as venous outflow stenosis and  
147 angio-architecture of the fistula. Additionally, the machine learning approach confirmed  
148 the relevance of previously deemed important characters such as pial feeder and  
149 venous ectasia(4, 11, 12). Intriguingly, this analysis suggest, for the first time, that the  
150 same character (venous outflow stenosis) that is associated with increased rupture risk  
151 in other, more frequent shunting vascular malformation such as the cerebral  
152 arteriovenous malformation (AVM)(13) presumably play the same role in dAVF's.

153 The presence of pial feeding arteries(14) and cortical venous drainage with or without  
154 abnormal venous dilatation(6) have been considered independent risk factors for  
155 predicting the natural history of dAVF's. As such, some of these characters (reflux in a  
156 cortical vein, venous ectasia) are part of the widely used classifications of Borden and

157 Cognard that guide treatment decision(5, 6). Despite the caveats of applying machine  
158 learning to small datasets (but see Olson et al., 2018 for a sound argument against  
159 this)(15), our work confirms and extends the findings of prior studies and makes the  
160 argument that the concomitant presence of these four features on the conventional  
161 angiography may be sufficient to achieved greater discriminant power regarding the  
162 bleeding risk. The congruence between the classification performance of the shallow  
163 neural network and random forest classifier underscores the stability of our findings and  
164 emphasizes their robust discriminatory power across distinct model paradigms. To our  
165 knowledge, this is the first study in literature that applies machine learning in evaluating  
166 features of dAVF's predictive for hemorrhage risk and is an approach that can be  
167 applied to other lesions and organs.

## 168 169 **Conclusions**

170  
171 Using machine learning, we show the importance of two new angiographic features  
172 (venous outflow stenosis and fistula architecture) for the evaluation of dAVF's. Their  
173 presence, independent or in addition to cortical venous drainage, venous ectasia and  
174 pial feeders, can predict with relative high accuracy the hemorrhagic risk of these  
175 lesions. This shows that simple machine learning algorithms can identify potential  
176 relevant, hidden, angio-architectural features of dural arteriovenous fistulas helping  
177 neurosurgeons and interventional neuroradiologists in the clinical decision-making  
178 process. Our approach can be applied to larger and more complex datasets as well to  
179 other vascular or non-vascular lesions.

180  
181 **Disclosure.** The authors have no competing financial interests.

182  
183 **Data availability statement.** Data is available upon reasonable request. The authors  
184 confirm that the data used in this study cannot be made available in the manuscript, the  
185 online supplemental files or in a public repository due to the German data protection law  
186 ("Bundesdatenschutzgesetz", BDSG)

187  
188 **Ethics approval.** This study was approved by the Ethics Committee of the  
189 Witten/Herdecke University

190  
191 **ORCID iD's**

192 Mihai Manu: <https://orcid.org/0000-0001-7776-4736>

193  
194 **References**

195



196

197

198 1. Satomi J, Satoh K. [Epidemiology and etiology of dural arteriovenous fistula].  
199 Brain Nerve. 2008;60(8):883-6.

200 2. Elhammady MS, Ambekar S, Heros RC. Epidemiology, clinical presentation,  
201 diagnostic evaluation, and prognosis of cerebral dural arteriovenous fistulas. Handb Clin  
202 Neurol. 2017;143:99-105.

203 3. Ide S, Kiyosue H. [Dural Arteriovenous Fistula]. No Shinkei Geka.  
204 2021;49(2):362-7.

205 4. Borden JA, Wu JK, Shucart WA. A proposed classification for spinal and cranial  
206 dural arteriovenous fistulous malformations and implications for treatment. J Neurosurg.  
207 1995;82(2):166-79.

208 5. Cognard C, Gobin YP, Pierot L, Bailly AL, Houdart E, Casasco A, et al. Cerebral  
209 dural arteriovenous fistulas: clinical and angiographic correlation with a revised  
210 classification of venous drainage. Radiology. 1995;194(3):671-80.

211 6. Zipfel GJ, Shah MN, Refai D, Dacey RG, Jr., Derdeyn CP. Cranial dural  
212 arteriovenous fistulas: modification of angiographic classification scales based on new  
213 natural history data. Neurosurg Focus. 2009;26(5):E14.

214 7. Söderman M, Pavic L, Edner G, Holmin S, Andersson T. Natural history of dural  
215 arteriovenous shunts. Stroke. 2008;39(6):1735-9.

216 8. Strom RG, Botros JA, Refai D, Moran CJ, Cross DT, 3rd, Chicoine MR, et al.  
217 Cranial dural arteriovenous fistulae: asymptomatic cortical venous drainage portends  
218 less aggressive clinical course. Neurosurgery. 2009;64(2):241-7; discussion 7-8.

219 9. Halford, M. Prince [Computer software]. <https://github.com/MaxHalford/prince>  
220 (accessed 20 January 2023)

221 10. Pedregosa F, Varoquaux G, Gramfort A, Michel V, Thirion B, Grisel O, et al.  
222 Scikit-learn: Machine learning in Python. the Journal of machine Learning research.  
223 2011;12:2825-30.

224 11. Brown RD, Jr., Wiebers DO, Nichols DA. Intracranial dural arteriovenous fistulae:  
225 angiographic predictors of intracranial hemorrhage and clinical outcome in nonsurgical  
226 patients. J Neurosurg. 1994;81(4):531-8.

227 12. Gross BA, Du R. The natural history of cerebral dural arteriovenous fistulae.  
228 Neurosurgery. 2012;71(3):594-602; discussion -3.

229 13. Chalil A, Raupp EF, Duckwiler GR, Viñuela F, Lownie SP. Hemodynamic and  
230 Anatomical Factors in Arteriovenous Malformation Clinical Presentation: 45 Case  
231 Studies. Can J Neurol Sci. 2023;50(1):37-43.

232 14. Osada T, Krings T. Intracranial Dural Arteriovenous Fistulas with Pial Arterial  
233 Supply. Neurosurgery. 2019;84(1):104-15.

234 15. Olson M, Wyner AJ, Berk R. Modern neural networks generalize on small data  
235 sets. Proceedings of the 32nd International Conference on Neural Information  
236 Processing Systems; Montréal, Canada: Curran Associates Inc.; 2018. p. 3623–32.

237

238

239

240

241

## 242 **Figure legends**

243

244 **Figure 1.** Angiographic characters of dural arteriovenous fistulas. (A) 3D reconstruction  
245 of a common carotid injection showing ectatic cortical vein (yellow arrowhead),  
246 segmental stenosis of the draining vein (white arrow) as well as a flow-associated  
247 aneurysm (red arrow). (B) Same patient as in A, CT scan showing cerebellar  
248 hemorrhage. (C) External carotid injection in another case showing a multiple feeder  
249 (black arrows) spread out type of fistula. (D) Left internal carotid injection showing a  
250 flow-associated aneurysm as well as dilated cortical vein (color-coding as in A). Note  
251 the prominent ophthalmic artery (white arrowhead). (E) 3D reconstruction of the  
252 previous angiography, viewed anterograde, demonstrating additionally a segmental  
253 stenosis of the draining vein (white arrow, color-coding as in A). (F) Same patient as in  
254 D and E, CT scan at presentation demonstrating a small left sided acute, non-traumatic  
255 subdural hematoma.

256

257 **Table 1.** Summary of the anatomical and angiographic characters of the dAVF.  
258 (\*)Venous ectasia was defined as a cortical dilated vein of more than 5mm diameter.  
259 (\*\*)Outflow stenosis was considered where there was a 50% abrupt change in the  
260 diameter of the cortical draining vein. (\*\*\*) Total bleeding events is less than the sum of  
261 compartment events (parenchyma, subdural and/or subarachnoidal space) due to  
262 concomitant presence of blood in more than one compartment.

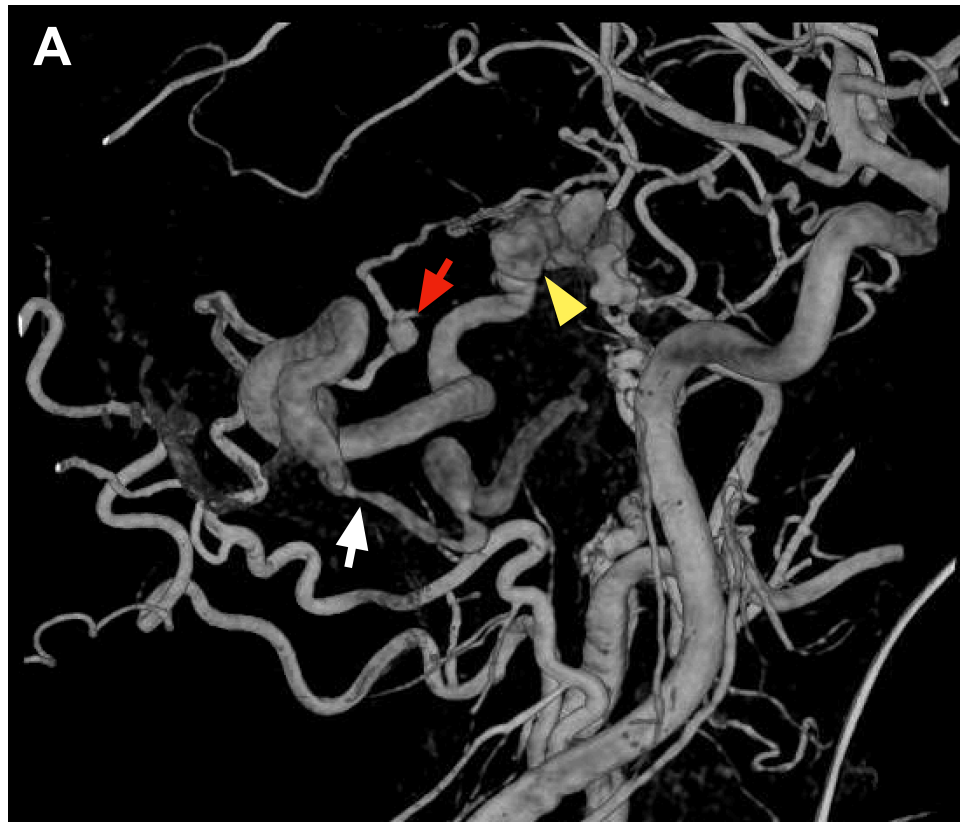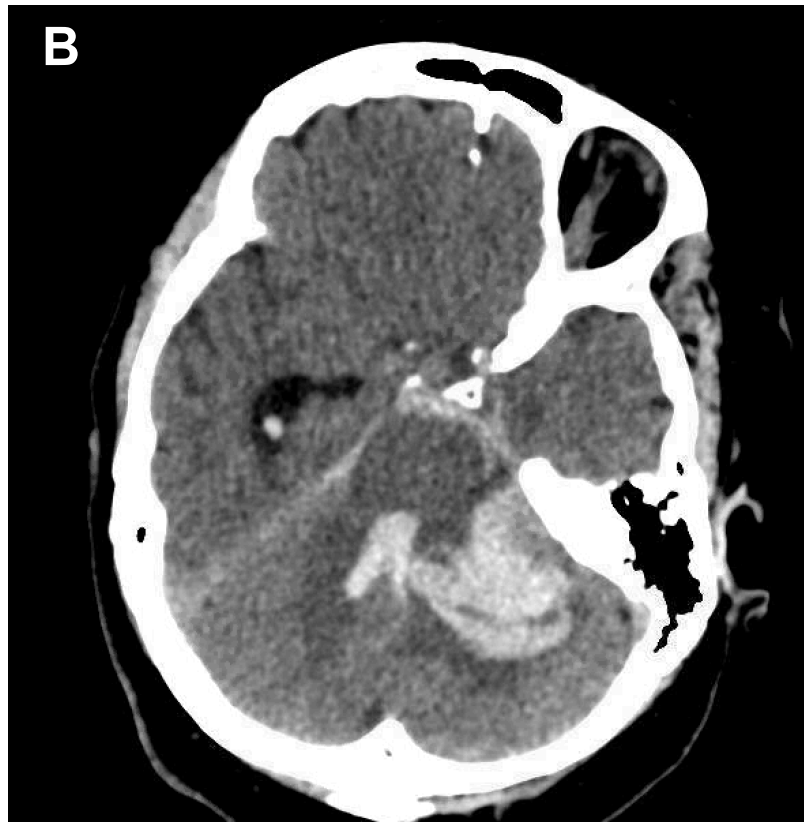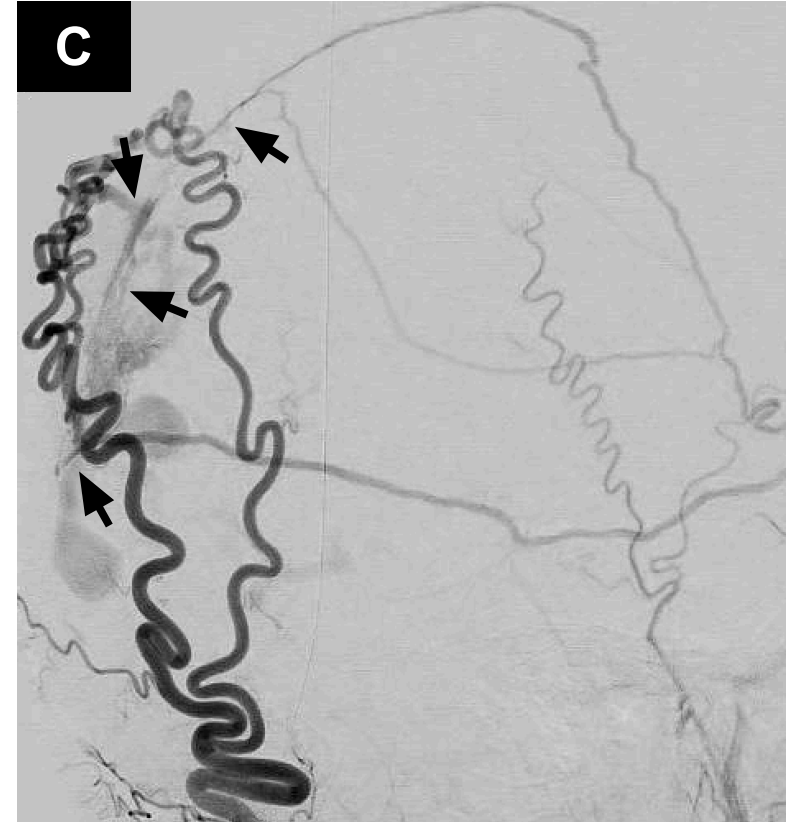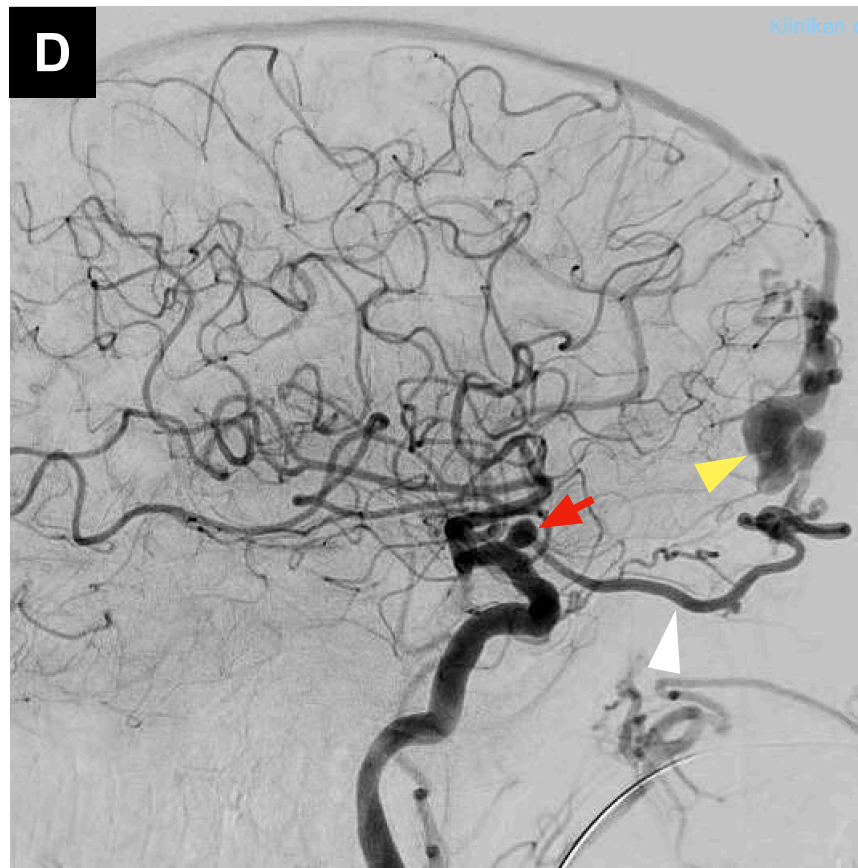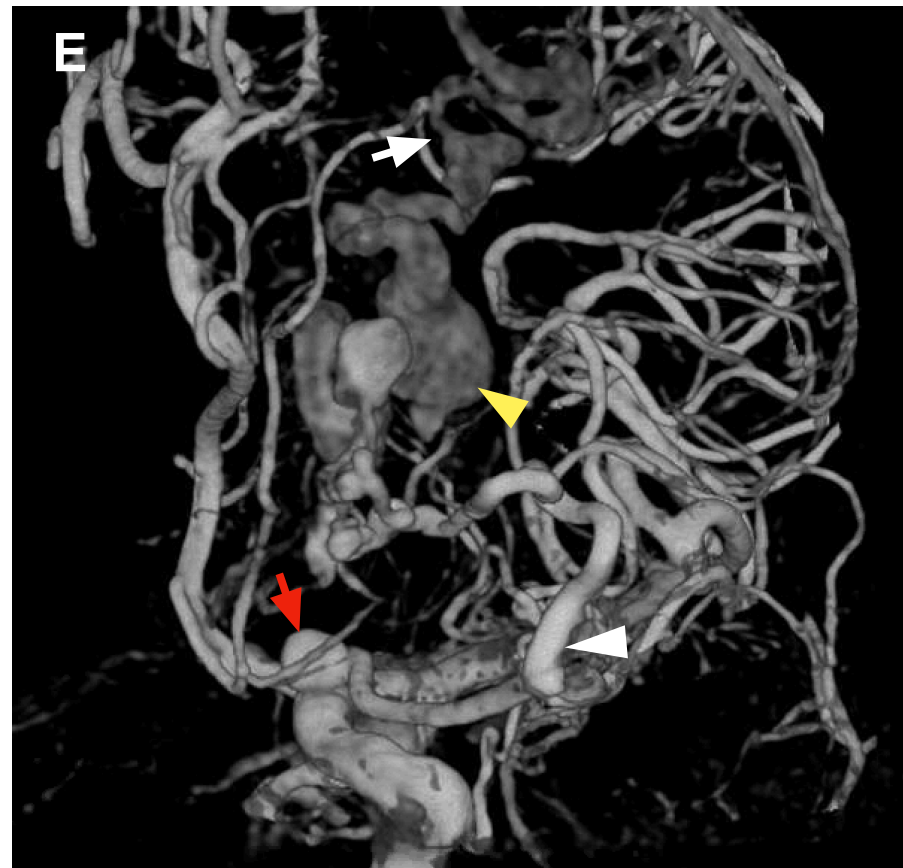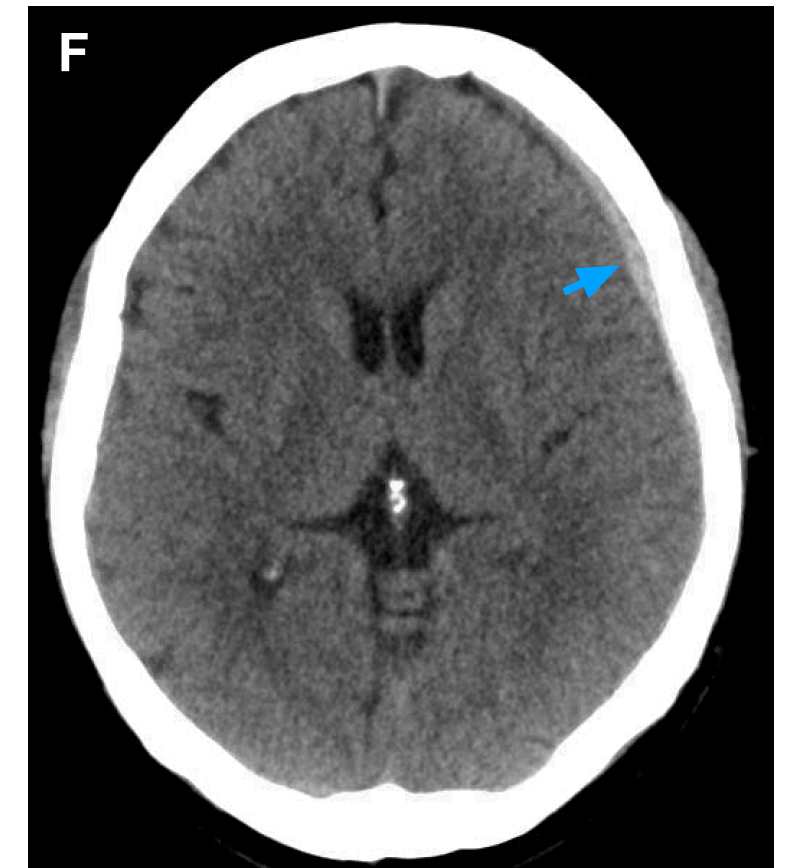



Table 1

| Pattern                                                                                                                                                                                                                   | Number (%)                                                                       |
|---------------------------------------------------------------------------------------------------------------------------------------------------------------------------------------------------------------------------|----------------------------------------------------------------------------------|
| Fistula location <ul style="list-style-type: none"> <li>• transverse-sigmoid junction</li> <li>• ethmoid</li> <li>• tentorial</li> <li>• petrosal</li> <li>• convexity cortical vein</li> <li>• foramen magnum</li> </ul> | 6/23 (26%)<br>1/23 (6%)<br>7/23 (30%)<br>2/23 (8%)<br>5/23 (21%)<br>2/23 (8%)    |
| Fistula architecture <ul style="list-style-type: none"> <li>• multi feeder spread-out</li> <li>• multi feeder converging</li> <li>• single feeder</li> </ul>                                                              | 14/23 (60%)<br>8/23 (36%)<br>1/23 (4%)                                           |
| Reflux in a cortical vein                                                                                                                                                                                                 | 20/23 (86%)                                                                      |
| Venous ectasia*                                                                                                                                                                                                           | 12/23 (52%)                                                                      |
| Pial feeder                                                                                                                                                                                                               | 9/23 (39%)                                                                       |
| Venous outflow stenosis**                                                                                                                                                                                                 | 15/23 (65%)                                                                      |
| Venous sinus thrombosis                                                                                                                                                                                                   | 6/23 (26%)                                                                       |
| Flow-associated aneurysm                                                                                                                                                                                                  | 3/23 (13%)                                                                       |
| <b>Presenting symptoms</b>                                                                                                                                                                                                |                                                                                  |
| Hemorrhage*** <ul style="list-style-type: none"> <li>• parenchymal</li> <li>• subdural</li> <li>• subarachnoidal</li> </ul>                                                                                               | 9/23 (39%)<br>5/23 (22%)<br>7/23 (30%)<br>2/23 (8%)                              |
| Seizures                                                                                                                                                                                                                  | 3/23 (13%)                                                                       |
| Tinnitus                                                                                                                                                                                                                  | 8/23 (34%)                                                                       |
| Visual field defects                                                                                                                                                                                                      | 1/23 (4%)                                                                        |
| Asymptomatic                                                                                                                                                                                                              | 2/23 (8%)                                                                        |
| <b>Cognard classification</b>                                                                                                                                                                                             |                                                                                  |
| <ul style="list-style-type: none"> <li>• I</li> <li>• IIa</li> <li>• IIb</li> <li>• III</li> <li>• IV</li> <li>• V</li> </ul>                                                                                             | 1/23 (4%)<br>1/23 (4%)<br>5/23 (21.7%)<br>4/23 (17%)<br>11/23 (48%)<br>1/23 (4%) |
